# Supplementary material
Source: publisher figshare collection journal article supplement (https://tandf.figshare.com/ndownloader/files/25850627)
Supplement: Supplementary file 1 [file 25850627]

## Sheet: Table S1
Parasitised host clutches with Brush Cuckoo eggs
Egg/Clutch ID	Scientific name of host	Common name of host	Clutch size (cuckoo + host)	Year collected	State	Locality of Collection	Collecting Team	Estimated host egg length (mm)	Estimated host egg width (mm)	Estimated host egg volume (ml)	Estimated cuckoo egg length (mm)	Estimated cuckoo egg width (mm)	Estimated cuckoo egg volume (ml)
E03803	Rhipidura albiscapa	Grey Fantail	1+2	1961	NSW	Tenterfield Creek, Leefield, Tenterfield	Goddard, M.T.	16.429	12.376	1.27855	19.458	15.34	2.36275
E03804	Myiagra rubecula	Leaden Flycatcher	1+1	1957	NSW	Sawyers Creek, Mount Mackenzie, 4 miles SW of Tenterfield	Goddard, M.T.	18.571	14.56	2.00588	19.357	15.088	2.27586
E04394	Ramsayornis modestus	Brown-backed Honeyeater	1+1	1974	QLD	Christies Road, Ingham	Young, C.H.; Young, S.C.	18.676	13.239	1.67266	17.844	12.535	1.45753
E08812	Rhipidura albiscapa	Grey Fantail	1+3	1879	NSW	Near Old NewingtonCollege, Paramatta River, Paramatta	Baird, W.W.	15.788	12.968	1.38024	17.728	14.552	1.95691
E08813	Rhipidura albiscapa	Grey Fantail	1+2	1908	NSW	Chatswood, Sydney	not recorded	16.171	12.723	1.35268	17.811	14.065	1.82898
E10749	Myiagra rubecula	Leaden Flycatcher	1+2	1985	NSW	Leeches Gully, Boonoo Boonoo, 5 miles N of Tenterfield	Goddard, M.T.	19.206	14.362	2.03821	18.084	14.672	2.02036
E10750	Myiagra rubecula	Leaden Flycatcher	2+1	1980	NSW	Leeches Gully, Boonoo Boonoo, 5 miles N of Tenterfield	Goddard, M.T.	18.167	13.84	1.79466	18.599	14.724	2.09279
E10751	Rhipidura rufifrons	Rufous Fantail	1+1	1986	NSW	Quigeram Creek, The Scrub, Tenterfield	Goddard, M.T.	18.148	13.518	1.70742	18.467	15.413	2.28574
E10752	Malurus melanocephalus	Red-backed Fairy-wren	1+2	1987	NSW	Mount Gipps, Border Loop, McPherson Range	Goddard, M.T.	16.581	12.576	1.34491	17.949	14.488	1.93728
E11493	Myiagra rubecula	Leaden Flycatcher	1+2	1976	NSW	Wallis Creek, near Buchanan, C.10 KM SSW of Maitland	Walker, G.L.	17.956	13.61	1.70964	18.959	14.717	2.13011
E11494	Rhipidura rufifrons	Rufous Fantail	1+1	1961	NSW	Wollongong	Wood, E.A.	18.902	14.138	1.95958	18.159	14.416	1.95834
E11495	Rhipidura albiscapa	Grey Fantail	1+2	1956	NSW	Sawyers Gully, Donnybrook Mnts, C.8 KM SW of Tenterfield	Goddard, M.T.	16.598	12.889	1.41775	18.242	14.834	2.0887
E11496	Rhipidura rufifrons	Rufous Fantail	1+2	1978	NSW	Hacking River, Waterfall, C.45 KM S of Sydney	Drummond, P.D.	18.536	13.645	1.79948	17.521	14.303	1.86361
E11497	Conopophila albogularis	Rufous-banded Honeyeater	1+2	1982	NT	Beatrice Hill, Humpty Doo, E of Darwin	Smart, J.A.	18.685	13.891	1.81941	16.838	13.198	1.52856
E11498	Ramsayornis modestus	Brown-backed Honeyeater	1+1	1974	QLD	Christies Swamp, near Ingham	Walker, G.L.; Young, J.H.	19.354	13.91	1.86821	18.711	12.858	1.6039
E11499	Myiagra inquieta	Restless Flycatcher	1+2	1978	NSW	Antiene, C.10 KM SE of Muswellbrook	Milton, L.E.; Hallet, K.W.	20.425	15.432	2.51596	18.289	14.868	2.09402
E11500	Ramsayornis fasciatus	Bar-breasted Honeyeater	1+1	1980	NT	Howard Springs Swamp, 23 KM SE of Darwin	Smart, J.A.	18.609	13.327	1.70253	17.622	12.858	1.50989
E11501	Myiagra rubecula	Leaden Flycatcher	1+2	1962	NSW	Wybong, C.25 KM W of Muswellbrook	Milton, L.E.; Hallet, K.W.	17.644	14.124	1.81778	17.914	14.949	2.07929
E11502	Ramsayornis modestus	Brown-backed Honeyeater	1+2	1977	QLD	Pebbly Beach, C.7 KM SE of Port Douglas	Drummond, P.D.	17.82	13.811	1.75311	17.516	13.246	1.59974
E12495	Ramsayornis modestus	Brown-backed Honeyeater	1+2	1962	QLD	Airdmillan, 5 KM of Ayr	Seton, D.H.C.	20.57	14.03	2.09485	17.234	13.531	1.64082
E12496	Ramsayornis modestus	Brown-backed Honeyeater	1+2	1975	QLD	Christies Road, 8 miles N of Ingham	Seton, D.H.C.	19.72	13.8	1.88623	16.908	13.414	1.58338
E12497	Ramsayornis modestus	Brown-backed Honeyeater	1+1	1976	QLD	Christies Road, 8 miles N of Ingham	Seton, D.H.C.	18.752	12.558	1.50189	16.937	13.301	1.54706
E12498	Ramsayornis modestus	Brown-backed Honeyeater	1+2	1976	QLD	Christies Road, 8 miles N of Ingham	Seton, D.H.C.	18.761	12.686	1.54602	16.66	13.188	1.50481
E12499	Ramsayornis modestus	Brown-backed Honeyeater	1+2	1976	QLD	Christies Road, 8 miles N of Ingham	Seton, D.H.C.	18.067	13.938	1.78524	16.937	13.017	1.48687
E12502	Myiagra rubecula	Leaden Flycatcher	1+2	1978	QLD	Inverramsay, C.40 KM NE of Warwick	Seton, D.H.C.	19.222	13.935	1.92137	17.472	13.929	1.77013
E12518	Malurus melanocephalus	Red-backed Fairy-wren	1+3	1975	QLD	Ingham, 95 KM NW of Townsville	Seton, D.H.C.	15.569	12.801	1.29855	19.433	13.39	1.81362
E13791	Rhipidura albiscapa	Grey Fantail	1+3	1972	NSW	Yallah, C. 4.5 KM S of Dapto	Kershaw, J.	16.961	13.319	1.54571	17.969	14.888	2.07213
E19458	Rhipidura albiscapa	Grey Fantail	1+2	1957	NSW	Sawyers Creek, Mount Mackenzie, 4 miles SW of Tenterfield	Goddard, M.T.	15.775	12.609	1.28574	19.066	15.09	2.26233
E19459	Myiagra rubecula	Leaden Flycatcher	1+2	1966	NSW	Muswellbrook	Hallett, K.W. and Milton, L.E.	18.379	14.121	1.88622	18.235	14.267	1.92367
E19460	Myiagra rubecula	Leaden Flycatcher	1+3	1972	NSW	Sawyers Creek, Mount Mackenzie, 4 miles SW of Tenterfield	Goddard, M.T.	18.151	14.151	1.88352	18.275	14.626	2.03811
E19499	Ramsayornis modestus	Brown-backed Honeyeater	1+3	1982	QLD	Beach Road, [- to Alva], ca. 10 KM NNE of Ayr	Ey, A.E.	18.426	13.553	1.75327	19.534	13.36	1.81337
E19500	Ramsayornis modestus	Brown-backed Honeyeater	1+2	1981	QLD	Beach Road, [- to Alva], ca. 10 KM NNE of Ayr	Ey, A.E.	19.852	13.721	1.93057	17.177	13.7	1.67945
